# Supplementary material for: Energetics and transition-state dynamics of the F + HOCH3 → HF + OCH3 reaction
Source: Royal Society of Chemistry journal article supplement (doi:10.1039/c6cp06409d), 2016-01-01
Supplement: c6cp06409d1.pdf [file c6cp06409d1.pdf]

**Supplementary Materials for Transition-State Dynamics of the  
F + HOCH<sub>3</sub> → HF + OCH<sub>3</sub> Reaction**

**Table S1.** HF product vibrational population distributions. Populations determined by fitting E<sub>TOT</sub> spectrum with Gaussians centered over each shelf like peak (see Figure 4).

| <b>Energetic Pathway</b>                    | <b>Energetic Range (eV)</b> | <b>Fraction</b> |
|---------------------------------------------|-----------------------------|-----------------|
| HF(v=0) + OCH <sub>3</sub> + e <sup>-</sup> | 1.48 – 1.01                 | 16 %            |
| HF(v=1) + OCH <sub>3</sub> + e <sup>-</sup> | 1.01 – 0.55                 | 33%             |
| HF(v=2) + OCH <sub>3</sub> + e <sup>-</sup> | 0.55 – 0.12                 | 37%             |
| HF(v=3) + OCH <sub>3</sub> + e <sup>-</sup> | 0.12 – 0.00                 | 14%             |

**Figures S1.** Optimized geometries, frequencies and complete basis set extrapolated energetics for the  $\text{FHOCH}_3^-$  anion, neutral stationary points and fragments. As supported in literature, the methoxy radical has a  $C_s$  symmetry as expected from Jahn-Teller effects.(1)

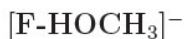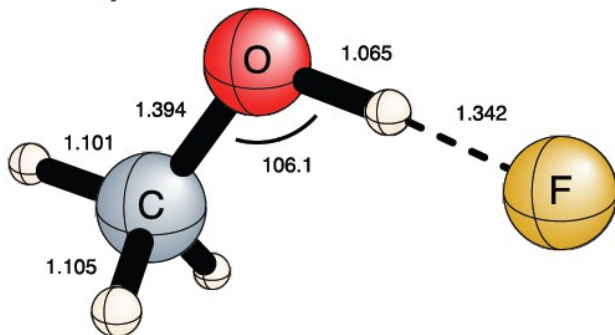

Symmetry:  $C_s$   
 Multiplicity: 1  
 Charge: -1

Reference: RHF  
 Theory: CCSD(T)/aug-cc-pVTZ

Geometry (Angstroms):

|   |               |               |               |
|---|---------------|---------------|---------------|
| H | -2.4647567198 | -0.2118348704 | -0.0000000000 |
| C | -1.3967367626 | -0.4805422825 | -0.0000000000 |
| O | -0.6171933427 | 0.6753384974  | 0.0000000000  |
| H | 0.3958138769  | 0.3472605467  | 0.0000000000  |
| F | 1.6407838745  | -0.1537544394 | -0.0000000000 |
| H | -1.2176445280 | -1.1166972155 | 0.8852937091  |
| H | -1.2176445280 | -1.1166972155 | -0.8852937091 |

Frequencies (Harmonic,  $\text{cm}^{-1}$ ):

65.5860  
 165.6900  
 406.8881  
 1119.6254  
 1151.6290  
 1168.7870  
 1223.9246  
 1451.9802  
 1487.5865  
 1510.3612  
 1641.4504  
 2065.3915  
 2913.1364  
 2928.3139  
 2970.6270

Zero-Point Vibrational Energy: 11135.489  $\text{cm}^{-1}$

Focal-Point Extrapolation (Hartrees):

|               | HF                  | MP2               | CCSD              | CCSD(T)           | CCSDT              | CCSDT(Q)           |
|---------------|---------------------|-------------------|-------------------|-------------------|--------------------|--------------------|
| DZ            | -214.528818304008   | -215.134240441367 | -215.153478490614 | -215.171385493782 | -215.172132014215  | -215.173053015990  |
| TZ            | -214.582538712364   | -215.322783808309 | -215.332862241548 | -215.360403529232 | -215.361150049665* | -215.362071051440* |
| QZ            | -214.596510026014   | -215.385157717157 | -215.388666644793 | -215.418383812629 | -215.419130333062* | -215.420051334837* |
| 5Z            | -214.600130770769   | -215.408132539130 | -215.406515404155 | -215.437042877529 | -215.437789397962* | -215.438710399737* |
| CBS           | -214.601397347778   | -215.429705033219 | -215.422709734193 | -215.454087364197 | -215.454833884630  | -215.455754886405  |
| CBS[CCSDT(Q)] | = -215.455754886405 |                   |                   |                   |                    |                    |

Notes: \* = Additive; XZ = aug-cc-pVXZ

[F-HOCH<sub>3</sub>]<sup>•</sup> (Entrance Complex)

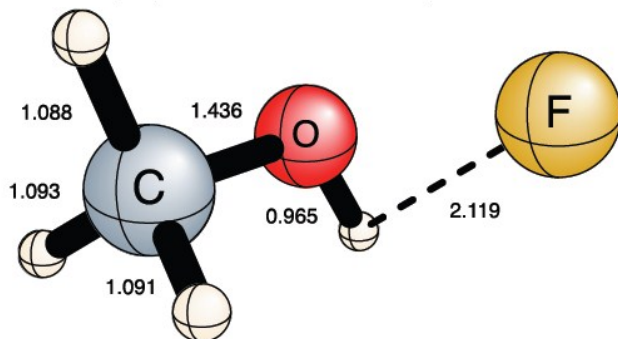

Symmetry: C1  
 Multiplicity: 2  
 Charge: 0

Reference: UHF

Theory: CCSD(T)/aug-cc-pVTZ

Geometry (Angstroms):

|   |               |               |               |
|---|---------------|---------------|---------------|
| O | -0.4199777929 | -0.6802073674 | 0.0641361132  |
| C | -1.2587027875 | 0.4823405114  | -0.0134355405 |
| H | -1.3308708483 | 0.8752604344  | 0.9981086628  |
| H | -0.8171698749 | 1.2356230446  | -0.6668517538 |
| H | -2.2516092782 | 0.1979151751  | -0.3716138658 |
| H | -0.1836185310 | -0.9503173902 | -0.8319669937 |
| F | 1.3917524950  | 0.1959460060  | 0.0007645288  |

Frequencies (Harmonic, cm<sup>-1</sup>):

116.6274  
 186.6914  
 349.4645  
 468.3833  
 1028.5867  
 1066.7706  
 1165.7133  
 1355.9393  
 1465.1192  
 1503.8684  
 1511.4339  
 3036.5505  
 3116.7783  
 3159.3996  
 3797.9918

Zero-Point Vibrational Energy: 11664.659 cm<sup>-1</sup>

Focal-Point Extrapolation (Hartrees):

|               | HF                  | MP2               | CCSD              | CCSD(T)           | CCSDT              | CCSDT(Q)           |
|---------------|---------------------|-------------------|-------------------|-------------------|--------------------|--------------------|
| DZ            | -214.424724455647   | -214.958457387933 | -215.000499392410 | -215.016498241167 | -215.017834246235  | -215.018718564177  |
| TZ            | -214.479190268640   | -215.142141044872 | -215.176495296530 | -215.200584766612 | -215.201920771680* | -215.202805089622* |
| QZ            | -214.493584278040   | -215.202183779485 | -215.230427963283 | -215.256505578315 | -215.257841583383* | -215.258725901325* |
| 5Z            | -214.497307231537   | -215.224372184546 | -215.247858204833 | -215.274678061346 | -215.276014066414* | -215.276898384356* |
| CBS           | -214.498606107943   | -215.245044649479 | -215.263538498212 | -215.291137099886 | -215.292473104954  | -215.293357422896  |
| CBS[CCSDT(Q)] | = -215.293357422896 |                   |                   |                   |                    |                    |

Notes: \* = Additive; XZ = aug-cc-pVXZ

[FH-OCH<sub>3</sub>]<sup>•</sup> (Exit Complex)

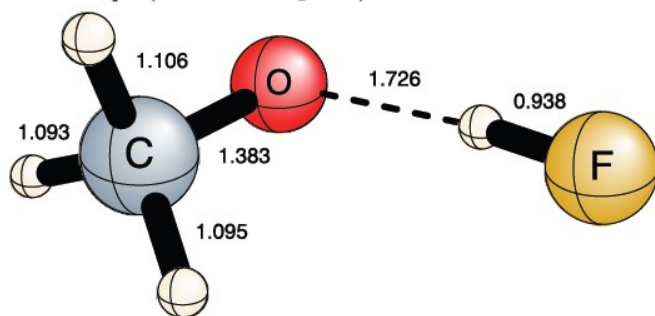

Symmetry: C1  
 Multiplicity: 2  
 Charge: 0  
 Reference: UHF  
 Theory: CCSD(T)/aug-cc-pVTZ  
 Geometry (Angstroms):

|   |               |               |               |
|---|---------------|---------------|---------------|
| O | 0.7471955025  | -0.6716662508 | 0.0033854591  |
| C | 1.4803063123  | 0.5014271410  | 0.0080598458  |
| H | 2.4834837470  | 0.3552522450  | 0.4173463214  |
| H | 1.5846008667  | 0.7683203853  | -1.0596938507 |
| H | 0.9406431622  | 1.3214318767  | 0.4932909297  |
| H | -0.9280909032 | -0.2574876955 | -0.0054424187 |
| F | -1.7805481639 | 0.1327208608  | 0.0002547406  |

Frequencies (Harmonic, cm<sup>-1</sup>):

71.9009  
 83.9551  
 241.2792  
 602.5135  
 751.1805  
 939.9783  
 1059.2103  
 1108.1638  
 1382.5050  
 1398.9144  
 1517.4867  
 2931.7169  
 3036.0868  
 3095.6729  
 3751.2820

Zero-Point Vibrational Energy: 10985.923 cm<sup>-1</sup>

Focal-Point Extrapolation (Hartrees):

|     | HF                | MP2               | CCSD              | CCSD(T)           | CCSDT              | CCSDT(Q)           |
|-----|-------------------|-------------------|-------------------|-------------------|--------------------|--------------------|
| DZ  | -214.475573326999 | -215.012504745392 | -215.047546209600 | -215.061645523621 | -215.062667018114  | -215.063456149631  |
| TZ  | -214.531192125908 | -215.197899131230 | -215.225557768438 | -215.247752033330 | -215.248773527823* | -215.249562659340* |
| QZ  | -214.545646653089 | -215.258462789392 | -215.280061175398 | -215.304174890157 | -215.305196384650* | -215.305985516167* |
| 5Z  | -214.549352682666 | -215.280634666356 | -215.297481046509 | -215.322312441734 | -215.323333936227* | -215.324123067744* |
| CBS | -214.550630503598 | -215.301286491104 | -215.313147160198 | -215.338731531650 | -215.339753026143  | -215.340542157660  |

CBS[CCSDT(Q)] = -215.340542157660

Notes: \* = Additive; XZ = aug-cc-pVXZ

HF

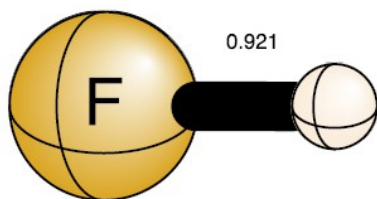

Symmetry: CXv  
Multiplicity: 1  
Charge: 0  
Reference: RHF  
Theory: CCSD(T)/aug-cc-pVTZ  
Geometry (Angstroms):  
H -0.0000000000 0.0000000000 0.8745636244  
F 0.0000000000 0.0000000000 -0.0463937473  
Frequencies (Harmonic, cm-1):  
4124.7472

Zero-Point Vibrational Energy: 2062.374 cm-1

Focal-Point Extrapolation (Hartrees):

|     | HF                | MP2               | CCSD              | CCSD(T)           | CCSDT              | CCSDT(Q)           |
|-----|-------------------|-------------------|-------------------|-------------------|--------------------|--------------------|
| DZ  | -100.033287053413 | -100.255788305249 | -100.259474686961 | -100.263630442566 | -100.263830428628  | -100.264137163873  |
| TZ  | -100.060880269470 | -100.340889967261 | -100.342036759143 | -100.349576765218 | -100.349776751280* | -100.350083486525* |
| QZ  | -100.068353271317 | -100.369755134558 | -100.369064955507 | -100.377372356504 | -100.377572342566* | -100.377879077811* |
| 5Z  | -100.070365351721 | -100.380551635374 | -100.377999965242 | -100.386617173132 | -100.386817159194* | -100.387123894439* |
| CBS | -100.071106704182 | -100.390509428923 | -100.386004718968 | -100.394946970157 | -100.395146956219  | -100.395453691464  |

CBS[CCSDT(Q)] = -100.395453691464

Notes: \* = Additive; XZ = aug-cc-pVXZ

F

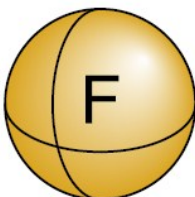

Symmetry: N/A  
Multiplicity: 2  
Charge: 0  
Reference: N/A  
Theory: N/A  
Geometry (Angstroms):  
F 0.0000000000 0.0000000000 0.0000000000

Frequencies (Harmonic, cm-1): N/A

Zero-Point Vibrational Energy: 0.000 cm-1

Focal-Point Extrapolation (Hartrees):

|     | HF               | MP2              | CCSD             | CCSD(T)          | CCSDT             | CCSDT(Q)          |
|-----|------------------|------------------|------------------|------------------|-------------------|-------------------|
| DZ  | -99.377068840441 | -99.535819217185 | -99.547684437107 | -99.550034466009 | -99.550257301114  | -99.550306424593  |
| TZ  | -99.402083121383 | -99.612395455677 | -99.623349655754 | -99.627771310919 | -99.627994146024* | -99.628043269503* |
| QZ  | -99.409209020633 | -99.638366845418 | -99.647865823443 | -99.652845103801 | -99.653067938907* | -99.653117062386* |
| 5Z  | -99.411197055579 | -99.648484015450 | -99.656371164198 | -99.661598289020 | -99.661821124125* | -99.661870247604* |
| CBS | -99.411966301848 | -99.657782190334 | -99.663978239511 | -99.669465397870 | -99.669688232975  | -99.669737356454  |

CBS[CCSDT(Q)] = -99.669737356454

Notes: \* = Additive; XZ = aug-cc-pVXZ

CH<sub>3</sub>OH

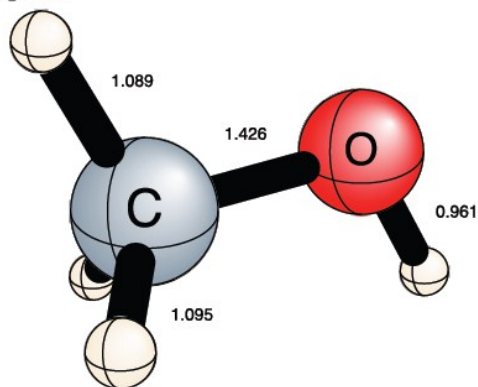

Symmetry: Cs  
Multiplicity: 1  
Charge: 0

Reference: RHF  
Theory: CCSD(T)/aug-cc-pVTZ

Geometry (Angstroms):

|   |               |               |               |
|---|---------------|---------------|---------------|
| H | -1.0996475426 | 1.0120821384  | -0.0000000000 |
| C | -0.7311839008 | -0.0131018148 | -0.0000000000 |
| O | 0.6924885394  | 0.0641652550  | -0.0000000000 |
| H | 1.0384884430  | -0.8324625523 | 0.0000000000  |
| H | -1.1115275507 | -0.5209838335 | 0.8921594664  |
| H | -1.1115275507 | -0.5209838335 | -0.8921594664 |

Frequencies (Harmonic, cm-1):

286.3098  
1053.6102  
1082.3107  
1175.8976  
1379.1734  
1484.0511  
1512.3468  
1522.8069  
3010.8930  
3069.2137  
3128.3213  
3843.6384

Zero-Point Vibrational Energy: 11274.286 cm-1

Focal-Point Extrapolation (Hartrees):

|     | HF                | MP2               | CCSD              | CCSD(T)           | CCSDT              | CCSDT(Q)           |
|-----|-------------------|-------------------|-------------------|-------------------|--------------------|--------------------|
| DZ  | -115.061422396222 | -115.421725085753 | -115.445030408706 | -115.455506518321 | -115.456019241274  | -115.456666120204  |
| TZ  | -115.091859989843 | -115.528980458176 | -115.546474699481 | -115.562384200492 | -115.562896923445* | -115.563543802375* |
| QZ  | -115.099343567672 | -115.563036674836 | -115.576018231604 | -115.593165648254 | -115.593678371206* | -115.594325250136* |
| 5Z  | -115.101211146891 | -115.575260055851 | -115.585154987102 | -115.602736972637 | -115.603249695590* | -115.603896574520* |
| CBS | -115.101832203338 | -115.586746215820 | -115.593402720301 | -115.611440646961 | -115.611953369914  | -115.612600248844  |

CBS[CCSDT(Q)] = -115.612600248844

Notes: \* = Additive; XZ = aug-cc-pVXZ



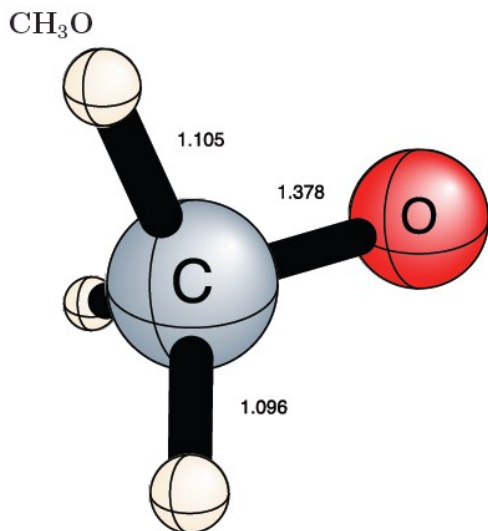

Symmetry: Cs  
 Multiplicity: 2  
 Charge: 0  
 Reference: UHF  
 Theory: CCSD(T)/aug-cc-pVTZ  
 Geometry (Angstroms):

|   |               |               |               |
|---|---------------|---------------|---------------|
| H | 1.0589098640  | -0.9626481038 | 0.0000000000  |
| C | -0.0072949200 | -0.6740554807 | 0.0000000000  |
| O | -0.0035957065 | 0.7042224416  | 0.0000000000  |
| H | -0.4574919989 | -1.0940049732 | -0.9069787207 |
| H | -0.4574919989 | -1.0940049732 | 0.9069787207  |

Frequencies (Harmonic, cm<sup>-1</sup>):

760.1169  
 960.6815  
 1106.6601  
 1390.6514  
 1393.4597  
 1521.8374  
 2936.1158  
 3017.5659  
 3060.8824

Zero-Point Vibrational Energy: 8073.986 cm<sup>-1</sup>

Focal-Point Extrapolation (Hartrees):

|               | HF                  | MP2               | CCSD              | CCSD(T)           | CCSDT              | CCSDT(Q)           |
|---------------|---------------------|-------------------|-------------------|-------------------|--------------------|--------------------|
| DZ            | -114.433894085706   | -114.743505444305 | -114.775351745145 | -114.784455336522 | -114.785266592797  | -114.785716951955  |
| TZ            | -114.462520855853   | -114.844067954478 | -114.871086983345 | -114.884876470341 | -114.885687726616* | -114.886138085774* |
| QZ            | -114.469626817458   | -114.875907721423 | -114.898771603962 | -114.913696358191 | -114.914507614467* | -114.914957973625* |
| 5Z            | -114.471416567147   | -114.887448562581 | -114.907449431160 | -114.922777604705 | -114.923588860980* | -114.924039220138* |
| CBS           | -114.472019102185   | -114.898281750964 | -114.915278801617 | -114.931030234773 | -114.931841491048  | -114.932291850206  |
| CBS[CCSDT(Q)] | = -114.932291850206 |                   |                   |                   |                    |                    |

Notes: \* = Additive; XZ = aug-cc-pVXZ

1. N. D. K. Petraco, W. D. Allen, H. F. Schaefer, Fragmentation path for hydrogen atom dissociation from methoxy radical. *J. Chem. Phys.* **116**, 10229-10237 (2002).
